# Supplementary material for: Quantitative relationship between cholesterol distribution and ordering of lipids in asymmetric lipid bilayers
Source: Royal Society of Chemistry journal article supplement (doi:10.1039/d0sm01709d), 2021-01-01
Supplement: d0sm01709d1.pdf [file d0sm01709d1.pdf]

Supporting information for:

**Quantitative relationship between cholesterol distribution and ordering of lipids in asymmetric lipid bilayers**

Mohammadreza Aghaaminiha<sup>a</sup>, Amir M. Farnoud<sup>a</sup>, Sumit Sharma<sup>a,\*</sup>

<sup>a</sup>Department of Chemical and Biomolecular Engineering, Russ College of Engineering and Technology, Ohio University, Athens, OH 45701, USA

**To whom correspondence should be addressed:** Dr. Sumit Sharma, Ohio University, Department of Chemical and Biomolecular Engineering, 181 Stocker Center, Athens, OH, 45701 USA, Tel.: (740) 593-1425; E-mail: sharmas@ohio.edu

**Keywords:** Cholesterol, membrane asymmetry, lipid bilayer, molecular dynamics

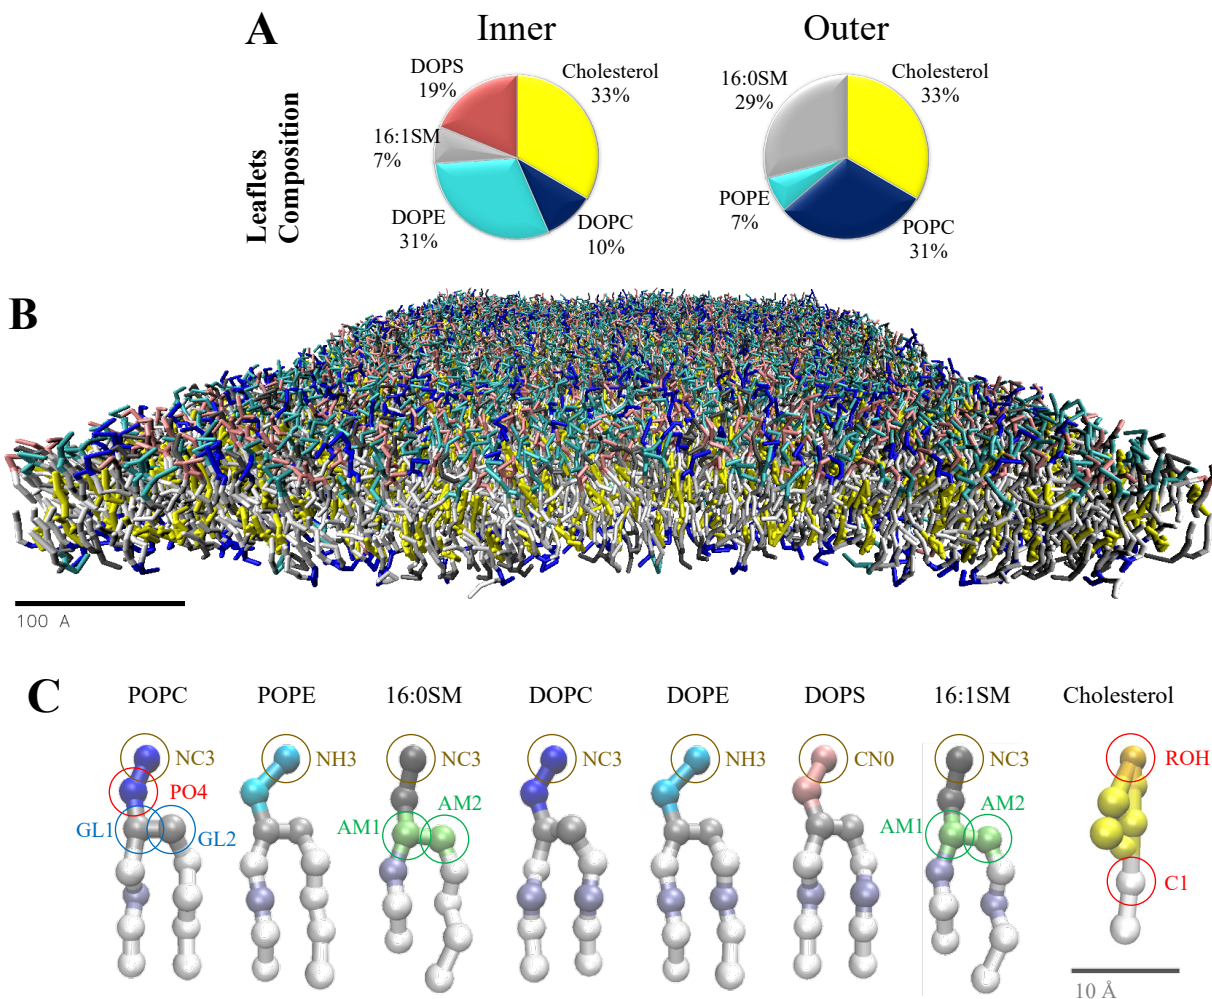

**Figure S1.** **A)** Composition of the asymmetric lipid bilayer studied in this work. **B)** A snapshot of equilibrium configuration of the asymmetric lipid bilayer at 37 °C. The top-view shown in the Figure S1B corresponds to the inner-leaflet while the bottom view (not shown) corresponds to the outer-leaflet. Ions and water molecules are omitted for the sake of clarity. The colors of headgroups shown in Figure S1B match the colors shown in the pie-chart of Figure S1A. Lipid chains are shown in white. **C)** The structure of lipids in the CG Martini force field representation. The second bead of the headgroups for all phospholipids is phosphate (PO4). The glycerol backbone (GL1 and GL2) are colored light silver while the green beads show the sphingosine backbone (AM1 and AM2). The beads with the unsaturation are colored in purple. Bead types are as follows: (choline NC3: Q0, ethanolamine NH3: Qd, serine CN0: P5, phosphate PO4: Qa, glycerol GL1: Na, glycerol GL2: Na, amide AM1: P1, amide AM2: P5, and cholesterol-hydroxyl ROH: SP1). GL1, GL2, and AM2 contain a carbonyl oxygen group while AM1 contains a hydroxyl group. The definition of Q0, Qd, Qa, Na, P1, P5, and SP1 are presented in the methodology section while the full explanation is available in the original paper.<sup>1</sup>

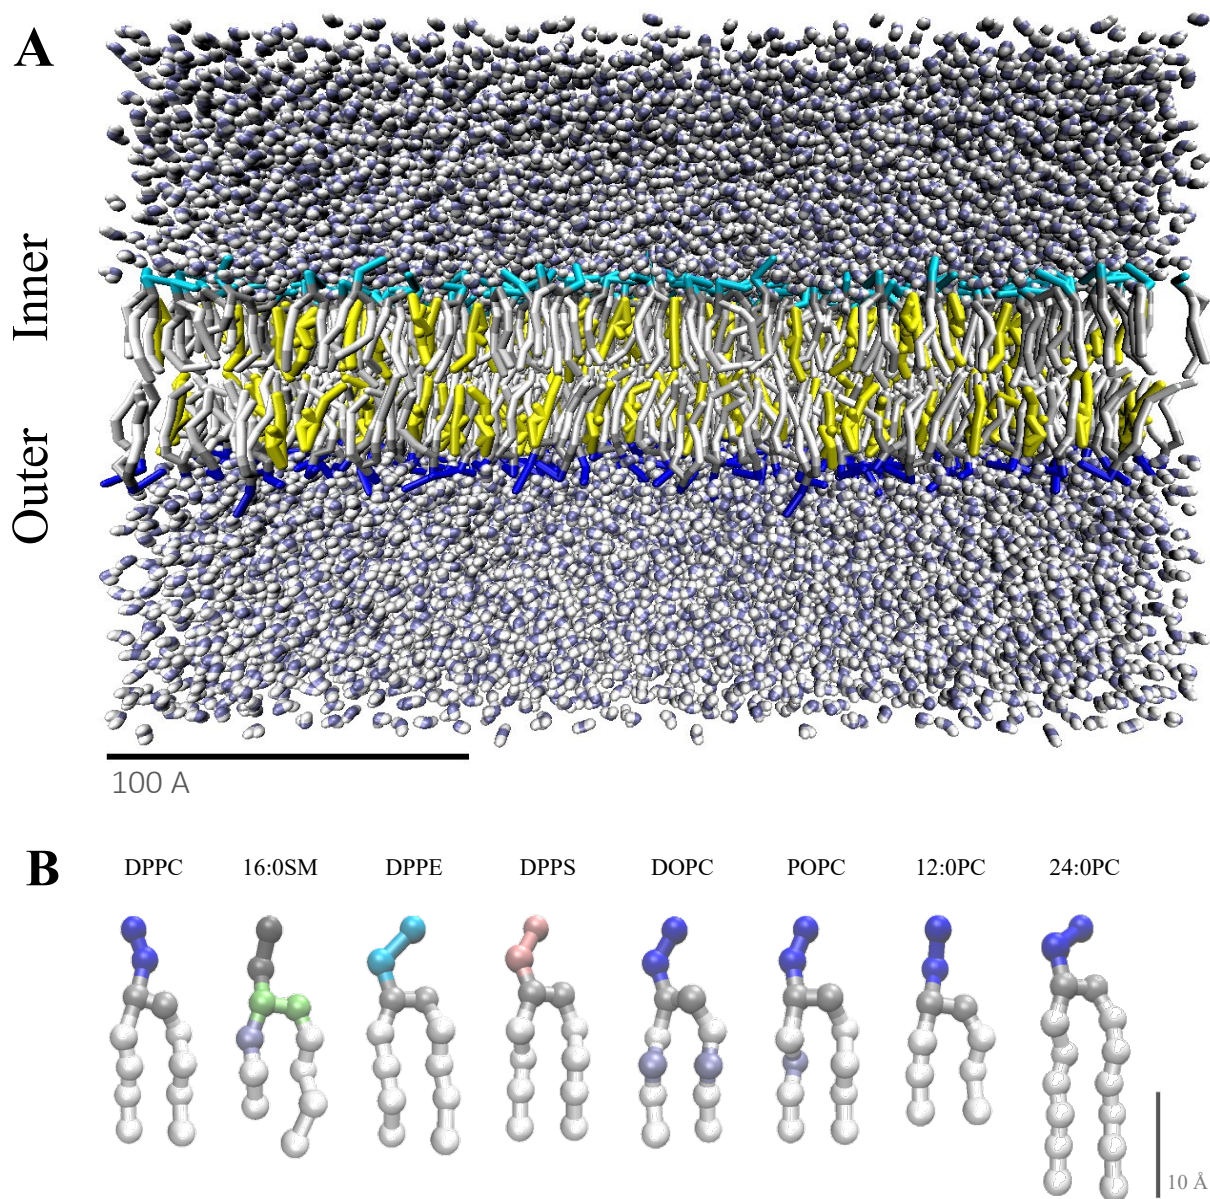

**Figure S2.** **A)** A snapshot of the equilibrated configuration of the DPPEi/DPPCo/CHOL system at 37 °C. **B)** Structure of lipids with CG Martini force field representation to understand the effects of the backbone (16:0SM), headgroup type (DPPE and DPPS), acyl chain saturation (DOPC and POPC), and acyl chain length (12:0PC and 24:0PC). The second bead of the headgroups of all phospholipids is phosphate (PO4). The glycerol backbone (GL1 and GL2) are colored light silver while the green beads show the sphingosine backbone (AM1 and AM2). The beads with unsaturation are colored in purple. Bead types are as follows: (choline NC3: Q0, ethanolamine NH3: Qd, serine CN0: P5, phosphate PO4: Qa, glycerol GL1: Na, glycerol GL2: Na, amide AM1: P1, amide AM2: P5, and cholesterol-hydroxyl ROH: SP1). According to the molecular structure, GL1, GL2, and AM2 contain a carbonyl oxygen group while AM1 contains a hydroxyl group. The definition of Q0, Qd, Qa, Na, P1, P5, and SP1 are presented in the methodology section while the full explanation is available in the original paper.<sup>1</sup>

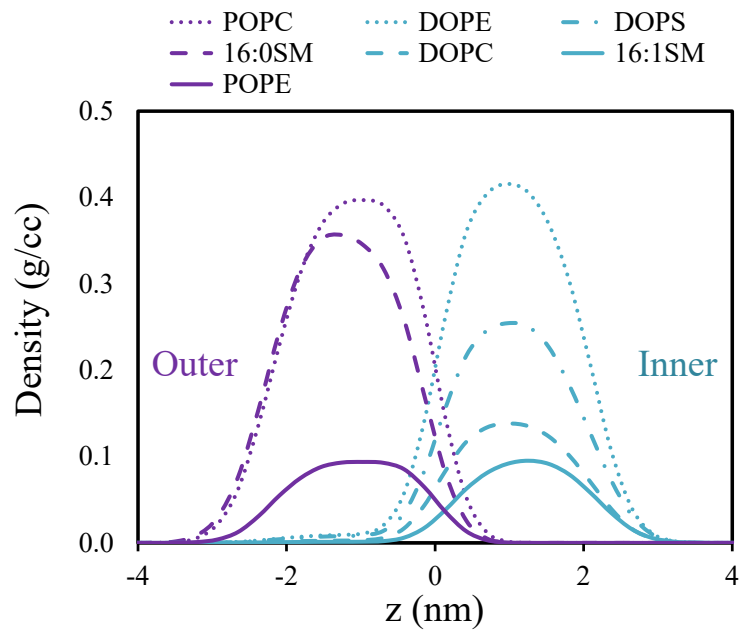

**Figure S3.** Density profile of phospholipids in the asymmetric system after 10  $\mu$ s simulation. Negative values of  $z$  correspond to the outer leaflet while the positive values represent the inner leaflet.

**Table S1.** Various properties of the three studied bilayers. Cholesterol was present in all the bilayers in the molar ratio of 1:2 with respect to the total number of lipids. The values of area per lipid is smaller compared to the usually reported values ( $\sim 0.5$  to  $0.7 \text{ nm}^2$ ) for the bilayers where no cholesterol present.<sup>2</sup>

| Lipid bilayer  | System (box)<br>area ( $\text{nm}^2$ ) | Thickness<br>( $\text{\AA}$ ) | Area per lipid ( $\text{nm}^2$ ) |                 | Average order parameter ( $S_{\text{chain}}$ ) |                 |
|----------------|----------------------------------------|-------------------------------|----------------------------------|-----------------|------------------------------------------------|-----------------|
|                |                                        |                               | Inner                            | Outer           | Inner                                          | Outer           |
| Asymmetric     | $507.63 \pm 0.07$                      | $41.24 \pm 0.14$              | $0.52 \pm 0.01$                  | $0.48 \pm 0.01$ | $0.33 \pm 0.02$                                | $0.48 \pm 0.02$ |
| Cyto-symmetric | $530.43 \pm 0.10$                      | $40.28 \pm 0.14$              | $0.52 \pm 0.01$                  | $0.52 \pm 0.01$ | $0.32 \pm 0.02$                                | $0.32 \pm 0.02$ |
| Exo-symmetric  | $484.77 \pm 0.12$                      | $42.25 \pm 0.14$              | $0.47 \pm 0.01$                  | $0.47 \pm 0.01$ | $0.48 \pm 0.02$                                | $0.48 \pm 0.02$ |

**Table S2.** Properties of equimolar asymmetric bilayer systems with DPPC as the outer-leaflet. Cholesterol was present in all the bilayers in the molar ratio of 1:2 with respect to the total number of lipids. The “i” and “o” subscripts represent the inner and outer leaflets, respectively.

| Lipid bilayer      | System (box)<br>area (nm <sup>2</sup> ) | Thickness<br>(Å) | Flip-flop rate<br>$1 \times 10^6$ 1/s | Area per lipid (nm <sup>2</sup> ) |             |
|--------------------|-----------------------------------------|------------------|---------------------------------------|-----------------------------------|-------------|
|                    |                                         |                  |                                       | Inner                             | Outer       |
| DPPCi/DPPCo/CHOL   | 114.71 ± 0.84                           | 45.11 ± 0.25     | 0.26 ± 0.06                           | 0.45 ± 0.01                       | 0.45 ± 0.01 |
| 16:0SMi/DPPCo/CHOL | 115.28 ± 0.93                           | 43.52 ± 0.25     | 0.36 ± 0.06                           | 0.44 ± 0.01                       | 0.46 ± 0.01 |
| DPPEi/DPPCo/CHOL   | 114.39 ± 0.80                           | 45.17 ± 0.24     | 0.22 ± 0.04                           | 0.45 ± 0.01                       | 0.45 ± 0.01 |
| DPPSi/DPPCo/CHOL   | 115.59 ± 0.90                           | 44.97 ± 0.25     | 0.29 ± 0.05                           | 0.45 ± 0.01                       | 0.46 ± 0.01 |
| DOPCi/DPPCo/CHOL   | 124.60 ± 1.07                           | 42.62 ± 0.28     | 2.40 ± 0.32                           | 0.53 ± 0.01                       | 0.45 ± 0.01 |
| POPCi/DPPCo/CHOL   | 120.50 ± 0.98                           | 43.60 ± 0.25     | 1.30 ± 0.17                           | 0.50 ± 0.01                       | 0.44 ± 0.01 |
| 12:0PCi/DPPCo/CHOL | 115.36 ± 0.86                           | 41.81 ± 0.21     | 0.52 ± 0.07                           | 0.45 ± 0.01                       | 0.45 ± 0.01 |
| 24:0PCi/DPPCo/CHOL | 114.10 ± 0.93                           | 51.69 ± 0.27     | 2.10 ± 0.18                           | 0.43 ± 0.01                       | 0.46 ± 0.01 |
| DOPEi/DPPCo/CHOL   | 123.61 ± 1.04                           | 42.78 ± 0.26     | 2.10 ± 0.24                           | 0.53 ± 0.01                       | 0.45 ± 0.01 |
| POPEi/DPPCo/CHOL   | 119.64 ± 0.93                           | 43.75 ± 0.25     | 1.10 ± 0.17                           | 0.49 ± 0.01                       | 0.45 ± 0.01 |
| DOPSi/DPPCo/CHOL   | 125.58 ± 1.11                           | 42.42 ± 0.29     | 2.20 ± 0.25                           | 0.53 ± 0.01                       | 0.46 ± 0.01 |
| POPSi/DPPCo/CHOL   | 121.77 ± 1.06                           | 43.39 ± 0.26     | 1.30 ± 0.15                           | 0.49 ± 0.01                       | 0.46 ± 0.01 |

**Table S3.** Average  $S_{chain}$  of lipids in the equimolar asymmetric bilayers in the presence and absence of cholesterol. The “i” and “o” subscripts represent the inner and outer leaflets, respectively.

| Lipid bilayer      | 0% Cholesterol |             | 33% Cholesterol |             | Cholesterol Abundance |
|--------------------|----------------|-------------|-----------------|-------------|-----------------------|
|                    | $S_{Chain}$    |             | $S_{Chain}$     |             |                       |
|                    | Inner          | Outer       | Inner           | Outer       |                       |
| DPPCi/DPPCo/CHOL   | 0.40 ± 0.02    | 0.40 ± 0.02 | 0.69 ± 0.02     | 0.68 ± 0.02 | Equal                 |
| 16:0SMi/DPPCo/CHOL | 0.40 ± 0.02    | 0.41 ± 0.02 | 0.69 ± 0.02     | 0.62 ± 0.02 | Inner                 |
| DPPEi/DPPCo/CHOL   | 0.42 ± 0.02    | 0.42 ± 0.02 | 0.71 ± 0.02     | 0.69 ± 0.02 | Inner                 |
| DPPSi/DPPCo/CHOL   | 0.38 ± 0.02    | 0.37 ± 0.02 | 0.69 ± 0.02     | 0.66 ± 0.02 | Inner                 |
| DOPCi/DPPCo/CHOL   | 0.27 ± 0.02    | 0.32 ± 0.02 | 0.34 ± 0.02     | 0.64 ± 0.02 | Outer                 |
| POPCi/DPPCo/CHOL   | 0.32 ± 0.02    | 0.35 ± 0.02 | 0.45 ± 0.02     | 0.67 ± 0.02 | Outer                 |
| 12:0PCi/DPPCo/CHOL | 0.39 ± 0.02    | 0.40 ± 0.02 | 0.69 ± 0.02     | 0.69 ± 0.02 | Outer                 |
| 24:0PCi/DPPCo/CHOL | 0.42 ± 0.02    | 0.40 ± 0.02 | 0.66 ± 0.02     | 0.65 ± 0.02 | Inner                 |
| DOPEi/DPPCo/CHOL   | 0.28 ± 0.02    | 0.33 ± 0.02 | 0.35 ± 0.02     | 0.64 ± 0.02 | Outer                 |
| POPEi/DPPCo/CHOL   | 0.34 ± 0.02    | 0.37 ± 0.02 | 0.48 ± 0.02     | 0.66 ± 0.02 | Outer                 |
| DOPSi/DPPCo/CHOL   | 0.26 ± 0.02    | 0.30 ± 0.02 | 0.35 ± 0.02     | 0.60 ± 0.02 | Outer                 |
| POPSi/DPPCo/CHOL   | 0.31 ± 0.02    | 0.33 ± 0.02 | 0.47 ± 0.02     | 0.61 ± 0.02 | Outer                 |

**Table S4.** Comparative data of lipid bilayers: we have studied symmetric bilayers, equimolar asymmetric bilayers (denoted by \*\*) and asymmetric bilayers with no build-in stress (denoted by \*).

| Lipid bilayers          | Initial distribution |       |        |       | Final distribution |       |        |       | Chol%     |       | sys area             | <i>area/ lipid</i>      |       | $S_{\text{Chain}}$ |       |
|-------------------------|----------------------|-------|--------|-------|--------------------|-------|--------|-------|-----------|-------|----------------------|-------------------------|-------|--------------------|-------|
|                         | # lipids             |       | # chol |       | # lipids           |       | # chol |       | $\pm 1\%$ |       | $\pm 1 \text{ nm}^2$ | $\pm 0.01 \text{ nm}^2$ |       | $\pm 0.02$         |       |
|                         | inner                | outer | inner  | outer | inner              | outer | inner  | outer | inner     | outer |                      | inner                   | outer | inner              | outer |
| DOPCi/DOPCo/CHOL        | 170                  | 170   | 85     | 85    | 170                | 170   | 85     | 85    | 50        | 50    | 135                  | 0.53                    | 0.53  | 0.31               | 0.31  |
| DPPCi/DPPCo/CHOL        | 170                  | 170   | 85     | 85    | 170                | 170   | 87     | 83    | 51        | 49    | 115                  | 0.45                    | 0.45  | 0.70               | 0.68  |
| DOPCi/DPPCo/CHOL (*)    | 192                  | 240   | 96     | 120   | 192                | 240   | 102    | 114   | 47        | 53    | 159                  | 0.54                    | 0.45  | 0.28               | 0.69  |
| DOPCi/DPPCo/CHOL (**)   | 171                  | 171   | 84     | 84    | 170                | 170   | 62     | 106   | 37        | 63    | 125                  | 0.53                    | 0.45  | 0.34               | 0.64  |
| POPCi/POPCo/CHOL        | 170                  | 170   | 85     | 85    | 170                | 170   | 86     | 84    | 50        | 50    | 127                  | 0.50                    | 0.50  | 0.43               | 0.43  |
| DPPCi/DPPCo/CHOL        | 170                  | 170   | 85     | 85    | 170                | 170   | 87     | 83    | 51        | 49    | 115                  | 0.45                    | 0.45  | 0.70               | 0.68  |
| POPCi/DPPCo/CHOL (*)    | 216                  | 240   | 108    | 120   | 216                | 240   | 107    | 121   | 47        | 53    | 162                  | 0.50                    | 0.45  | 0.43               | 0.69  |
| POPCi/DPPCo/CHOL (**)   | 170                  | 170   | 85     | 85    | 170                | 170   | 69     | 101   | 41        | 59    | 120                  | 0.50                    | 0.44  | 0.45               | 0.67  |
| DOPEi/DOPEo/CHOL        | 170                  | 170   | 85     | 85    | 170                | 170   | 85     | 85    | 50        | 50    | 133                  | 0.52                    | 0.52  | 0.33               | 0.33  |
| DPPCi/DPPCo/CHOL        | 170                  | 170   | 85     | 85    | 170                | 170   | 87     | 83    | 51        | 49    | 115                  | 0.45                    | 0.45  | 0.70               | 0.68  |
| DOPEi/DPPCo/CHOL (*)    | 192                  | 240   | 96     | 120   | 197                | 235   | 101    | 115   | 47        | 53    | 157                  | 0.52                    | 0.45  | 0.32               | 0.69  |
| DOPEi/DPPCo/CHOL (**)   | 171                  | 171   | 84     | 84    | 171                | 171   | 64     | 104   | 38        | 62    | 124                  | 0.53                    | 0.45  | 0.35               | 0.64  |
| POPEi/POPEo/CHOL        | 170                  | 170   | 85     | 85    | 170                | 170   | 87     | 83    | 51        | 49    | 125                  | 0.49                    | 0.49  | 0.47               | 0.45  |
| DPPCi/DPPCo/CHOL        | 170                  | 170   | 85     | 85    | 170                | 170   | 87     | 83    | 51        | 49    | 115                  | 0.45                    | 0.45  | 0.70               | 0.68  |
| POPEi/DPPCo/CHOL (*)    | 216                  | 240   | 108    | 120   | 216                | 240   | 111    | 117   | 49        | 51    | 160                  | 0.49                    | 0.45  | 0.46               | 0.69  |
| POPEi/DPPCo/CHOL (**)   | 170                  | 170   | 85     | 85    | 170                | 170   | 73     | 97    | 43        | 57    | 120                  | 0.49                    | 0.45  | 0.48               | 0.66  |
| DPPEi/DPPEo/CHOL        | 170                  | 170   | 85     | 85    | 170                | 170   | 82     | 88    | 48        | 52    | 114                  | 0.45                    | 0.44  | 0.70               | 0.73  |
| DPPCi/DPPCo/CHOL        | 170                  | 170   | 85     | 85    | 170                | 170   | 87     | 83    | 51        | 49    | 115                  | 0.45                    | 0.45  | 0.70               | 0.68  |
| DPPEi/DPPCo/CHOL (*)    | 240                  | 240   | 120    | 120   | 240                | 240   | 124    | 116   | 52        | 48    | 161                  | 0.44                    | 0.45  | 0.72               | 0.69  |
| DPPEi/DPPCo/CHOL (**)   | 171                  | 171   | 84     | 84    | 171                | 171   | 86     | 82    | 51        | 49    | 114                  | 0.45                    | 0.45  | 0.71               | 0.69  |
| 16:0SMi/16:0SMo/CHOL    | 170                  | 170   | 85     | 85    | 171                | 169   | 87     | 83    | 51        | 49    | 114                  | 0.44                    | 0.45  | 0.69               | 0.66  |
| DPPCi/DPPCo/CHOL        | 170                  | 170   | 85     | 85    | 170                | 170   | 87     | 83    | 51        | 49    | 115                  | 0.45                    | 0.45  | 0.70               | 0.68  |
| 16:0SMi/DPPCo/CHOL (*)  | 240                  | 240   | 120    | 120   | 240                | 240   | 129    | 111   | 54        | 46    | 162                  | 0.44                    | 0.46  | 0.68               | 0.65  |
| 16:0SMi/DPPCo/CHOL (**) | 171                  | 171   | 84     | 84    | 171                | 171   | 93     | 75    | 56        | 44    | 116                  | 0.44                    | 0.46  | 0.69               | 0.62  |
| 12:0PCi/12:0PCo/CHOL    | 170                  | 170   | 85     | 85    | 175                | 165   | 79     | 91    | 47        | 53    | 115                  | 0.45                    | 0.45  | 0.70               | 0.69  |
| DPPCi/DPPCo/CHOL        | 170                  | 170   | 85     | 85    | 170                | 170   | 87     | 83    | 51        | 49    | 115                  | 0.45                    | 0.45  | 0.70               | 0.68  |
| 12:0PCi/DPPCo/CHOL (*)  | 240                  | 240   | 120    | 120   | 240                | 240   | 117    | 123   | 49        | 51    | 162                  | 0.46                    | 0.45  | 0.68               | 0.69  |
| 12:0PCi/DPPCo/CHOL (**) | 171                  | 171   | 84     | 84    | 171                | 171   | 83     | 85    | 49        | 51    | 115                  | 0.45                    | 0.45  | 0.69               | 0.69  |



**Table S5.** Partial molar area of cholesterol and two-chain lipids in symmetric DOPC/CHOL and DPPC/CHOL bilayers. The  $a(x)$  for the DOPC/CHOL bilayer varies linearly with  $x$  implying that the  $a_{DOPC}(x)$  and  $a_{chol}(x)$  are constants. On the other hand, the  $a(x)$  for the DPPC/CHOL bilayer shows some curvature implying that the partial molar areas are not constants for this bilayer.

| Lipid Bilayer | Cholesterol mole fraction ( $x$ ) | System area ( $\text{nm}^2$ ) | $a(x), \text{nm}^2$<br>$\pm 0.01$ | $a_{chol}(x), \text{nm}^2$<br>$\pm 0.01$ | $a_{lipid}(x), \text{nm}^2$<br>$\pm 0.01$ | $S_{\text{Chain}}$<br>$\pm 0.02$ |
|---------------|-----------------------------------|-------------------------------|-----------------------------------|------------------------------------------|-------------------------------------------|----------------------------------|
| DOPC/CHOL     | 0                                 | $177.68 \pm 1.59$             | 0.69                              |                                          | 0.69                                      | 0.23                             |
|               | 10                                | $164.25 \pm 1.60$             | 0.64                              | 0.21                                     | 0.69                                      | 0.25                             |
|               | 20                                | $151.16 \pm 1.42$             | 0.59                              | 0.21                                     | 0.69                                      | 0.27                             |
|               | 30                                | $139.03 \pm 1.33$             | 0.55                              | 0.21                                     | 0.69                                      | 0.30                             |
|               | 33                                | $134.92 \pm 1.35$             | 0.53                              | 0.21                                     | 0.69                                      | 0.31                             |
|               | 40                                | $127.09 \pm 1.21$             | 0.50                              | 0.21                                     | 0.69                                      | 0.33                             |
|               | 50                                | $115.96 \pm 1.12$             | 0.45                              | 0.21                                     | 0.69                                      | 0.37                             |
| DPPC/CHOL     | 0                                 | $157.78 \pm 1.52$             | 0.62                              |                                          | 0.62                                      | 0.40                             |
|               | 10                                | $143.32 \pm 1.49$             | 0.56                              | 0.07                                     | 0.61                                      | 0.47                             |
|               | 20                                | $129.40 \pm 1.24$             | 0.51                              | 0.13                                     | 0.60                                      | 0.56                             |
|               | 30                                | $118.09 \pm 0.93$             | 0.46                              | 0.18                                     | 0.58                                      | 0.66                             |
|               | 33                                | $114.72 \pm 0.85$             | 0.45                              | 0.20                                     | 0.58                                      | 0.69                             |
|               | 40                                | $109.50 \pm 0.67$             | 0.43                              | 0.23                                     | 0.56                                      | 0.72                             |
|               | 50                                | $101.85 \pm 0.42$             | 0.40                              | 0.27                                     | 0.53                                      | 0.79                             |

## REFERENCES

- 1 S. J. Marrink, H. J. Risselada, S. Yefimov, D. P. Tieleman and A. H. de Vries, The MARTINI Force Field: Coarse Grained Model for Biomolecular Simulations, *J. Phys. Chem. B*, 2007, **111**, 7812–7824.
- 2 J. F. Nagle and S. Tristram-Nagle, Structure of lipid bilayers, *Biochim. Biophys. Acta BBA - Rev. Biomembr.*, 2000, **1469**, 159–195.
